# Supplementary material for: Is it possible to develop biopolymer production systems independent of fossil fuels? Case study in energy profiling of polyhydroxybutyrate-valerate (PHBV)
Source: Royal Society of Chemistry journal article supplement (doi:10.1039/c2gc36546d), 2012-12-13
Supplement: c2gc36546d.pdf [file c2gc36546d.pdf]

## Supplementary Information

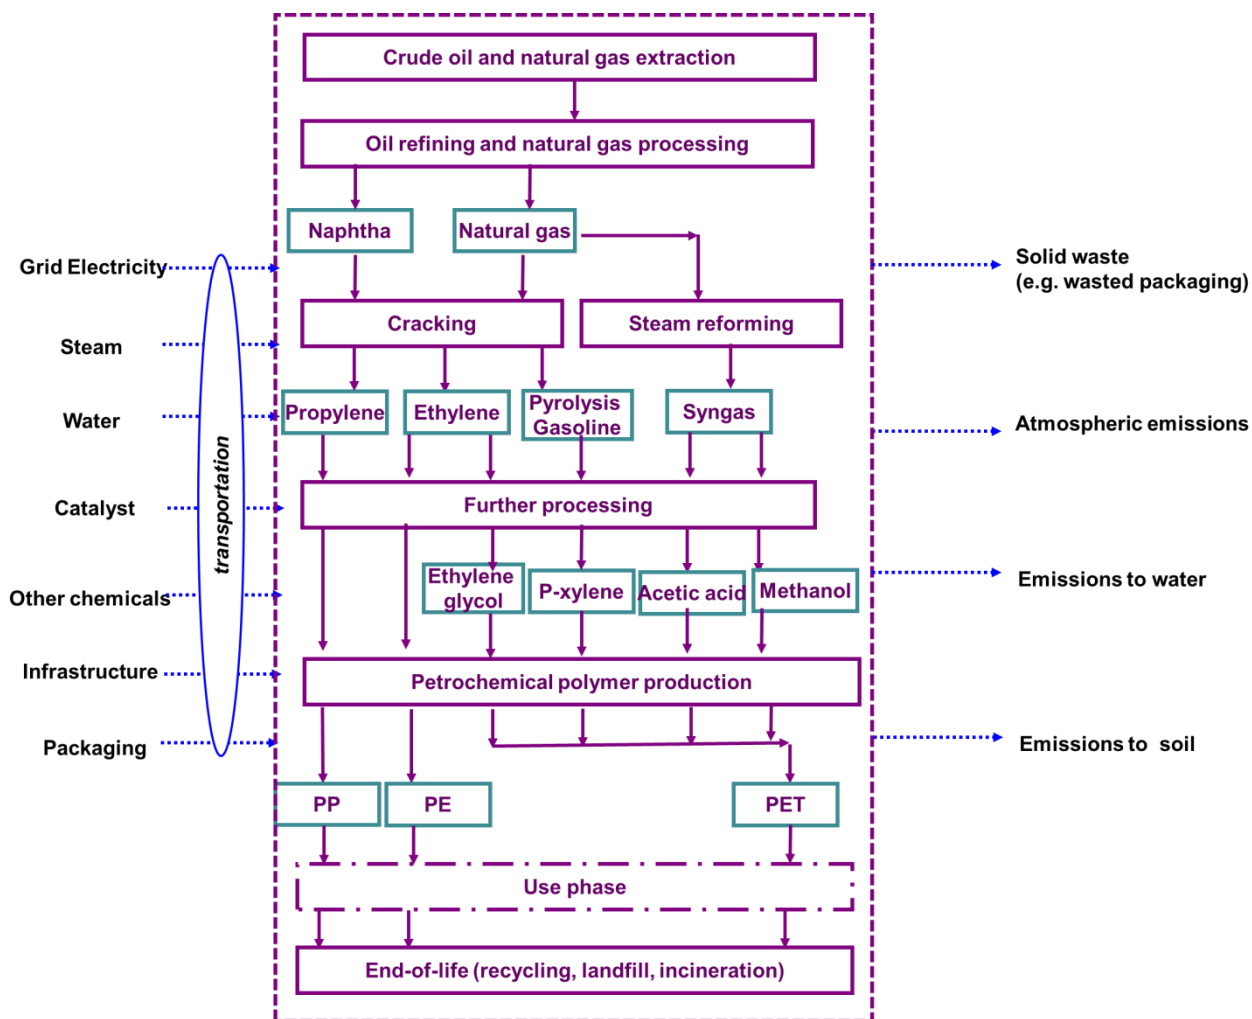

**Fig S.1 Petrochemical polymer product system modelled** (after PlasticsEurope). Notes: product consumption and disposal in the UK were modelled; use phase was excluded from the system boundary

Table S.1 Key assumptions for PHBV scenarios

|                                                                       | Electricity for PHBV production | Steam for PHBV production | Electricity for glucose production | Steam for glucose production | Waste water treatment during PHBV production | Carbon utilization efficiency | Glucose feedstock | Glucose production process |
|-----------------------------------------------------------------------|---------------------------------|---------------------------|------------------------------------|------------------------------|----------------------------------------------|-------------------------------|-------------------|----------------------------|
| Current production scenario                                           | Fossil                          | Fossil                    | Fossil                             | Fossil                       | Aerobic                                      | 50%                           | Corn              | Enzymatic hydrolysis       |
| Process optimization - Energy supply system and waste water treatment |                                 |                           |                                    |                              |                                              |                               |                   |                            |
| Scenario 1                                                            | Renewable                       | Fossil                    | Fossil                             | Fossil                       | Aerobic                                      | 50%                           | Corn              | Enzymatic hydrolysis       |
| Scenario 2                                                            | Fossil                          | Renewable <sup>a</sup>    | Fossil                             | Fossil                       | Aerobic                                      | 50%                           | Corn              | Enzymatic hydrolysis       |
| Scenario 3                                                            | Renewable                       | Renewable <sup>a</sup>    | Fossil                             | Fossil                       | Aerobic                                      | 50%                           | Corn              | Enzymatic hydrolysis       |
| Scenario 4                                                            | Fossil                          | Fossil                    | Renewable <sup>a</sup>             | Renewable <sup>a</sup>       | Aerobic                                      | 50%                           | Corn              | Enzymatic hydrolysis       |
| Scenario 5                                                            | Renewable                       | Renewable                 | Renewable <sup>a</sup>             | Renewable <sup>a</sup>       | Aerobic                                      | 50%                           | Corn              | Enzymatic hydrolysis       |
| Scenario 6                                                            | Renewable                       | Renewable                 | Renewable                          | Renewable <sup>a</sup>       | AD                                           | 50%                           | Corn              | Enzymatic hydrolysis       |
| Process optimization - Substrate carbon utilization efficiency        |                                 |                           |                                    |                              |                                              |                               |                   |                            |
| Scenario 7                                                            | Fossil                          | Fossil                    | Fossil                             | Fossil                       | Aerobic                                      | 60%                           | Corn              | Enzymatic hydrolysis       |
| Scenario 8                                                            | Fossil                          | Fossil                    | Fossil                             | Fossil                       | Aerobic                                      | 70%                           | Corn              | Enzymatic hydrolysis       |
| Scenario 9                                                            | Fossil                          | Fossil                    | Fossil                             | Fossil                       | Aerobic                                      | 80%                           | Corn              | Enzymatic hydrolysis       |
| Scenario 10                                                           | Renewable <sup>a</sup>          | Renewable <sup>a</sup>    | Renewable <sup>a</sup>             | Renewable <sup>a</sup>       | Aerobic                                      | 60%                           | Corn              | Enzymatic hydrolysis       |
| Scenario 11                                                           | Renewable <sup>a</sup>          | Renewable <sup>a</sup>    | Renewable <sup>a</sup>             | Renewable <sup>a</sup>       | Aerobic                                      | 70%                           | Corn              | Enzymatic hydrolysis       |
| Scenario 12                                                           | Renewable <sup>a</sup>          | Renewable <sup>a</sup>    | Renewable <sup>a</sup>             | Renewable <sup>a</sup>       | Aerobic                                      | 80%                           | Corn              | Enzymatic hydrolysis       |
| Process-optimization - Lignocellulosic glucose feedstock              |                                 |                           |                                    |                              |                                              |                               |                   |                            |
| Scenario 13                                                           | Fossil                          | Fossil                    | Renewable <sup>a</sup>             | Renewable <sup>a</sup>       | Aerobic                                      | 50%                           | Corn stover       | Enzymatic hydrolysis       |
| Scenario 14                                                           | Renewable <sup>a</sup>          | Renewable <sup>a</sup>    | Renewable <sup>a</sup>             | Renewable <sup>a</sup>       | Aerobic                                      | 50%                           | Corn stover       | Enzymatic hydrolysis       |
| Scenario 15                                                           | Renewable <sup>a</sup>          | Renewable <sup>a</sup>    | Renewable <sup>a</sup>             | Renewable <sup>a</sup>       | Aerobic                                      | 60%                           | Corn stover       | Enzymatic hydrolysis       |
| Scenario 16                                                           | Renewable <sup>a</sup>          | Renewable <sup>a</sup>    | Renewable <sup>a</sup>             | Renewable <sup>a</sup>       | Aerobic                                      | 70%                           | Corn stover       | Enzymatic hydrolysis       |
| Scenario 17                                                           | Renewable <sup>a</sup>          | Renewable <sup>a</sup>    | Renewable <sup>a</sup>             | Renewable <sup>a</sup>       | Aerobic                                      | 80%                           | Corn stover       | Enzymatic hydrolysis       |
| Scenario 18                                                           | Fossil                          | Fossil                    | Renewable <sup>a</sup>             | Renewable <sup>a</sup>       | Aerobic                                      | 50%                           | Softwood chips    | Dilute acid hydrolysis     |
| Scenario 19                                                           | Renewable <sup>a</sup>          | Renewable <sup>a</sup>    | Renewable <sup>a</sup>             | Renewable <sup>a</sup>       | Aerobic                                      | 50%                           | Softwood chips    | Dilute acid hydrolysis     |
| Scenario 20                                                           | Renewable <sup>a</sup>          | Renewable <sup>a</sup>    | Renewable <sup>a</sup>             | Renewable <sup>a</sup>       | Aerobic                                      | 60%                           | Softwood chips    | Dilute acid hydrolysis     |
| Scenario 21                                                           | Renewable <sup>a</sup>          | Renewable <sup>a</sup>    | Renewable <sup>a</sup>             | Renewable <sup>a</sup>       | Aerobic                                      | 70%                           | Softwood chips    | Dilute acid hydrolysis     |
| Scenario 22                                                           | Renewable <sup>a</sup>          | Renewable <sup>a</sup>    | Renewable <sup>a</sup>             | Renewable <sup>a</sup>       | Aerobic                                      | 80%                           | Softwood chips    | Dilute acid hydrolysis     |

*a. Bioenergy was assumed to be generated from wood biomass combustion in a CHP system (Ecoinvent database v 2.2)*

**Table S.2 Characterized fossil fuel profiles (MJ surplus energy) for PHBV vs. petrochemical polymers** (unit 1 kg granulate, method Eco-indicator 99 H V2.08)

| PHBV<br>(MJ surplus energy/kg polymer)               |             | Cradle-to-factory gate | Cradle-to-gate life cycles  |            |                  |
|------------------------------------------------------|-------------|------------------------|-----------------------------|------------|------------------|
|                                                      |             |                        | AD <sup>a</sup>             | Composting | EfW <sup>b</sup> |
| Current                                              |             | 6.69                   | 6.03                        | 6.58       | 5.82             |
| Energy supply system<br>and waste water<br>treatment | Scenario 1  | 6.10                   | 5.44                        | 5.99       | 5.23             |
|                                                      | Scenario 2  | 6.33                   | 5.67                        | 6.22       | 5.47             |
|                                                      | Scenario 3  | 5.74                   | 5.09                        | 5.63       | 4.88             |
|                                                      | Scenario 4  | 6.12                   | 5.46                        | 6.01       | 5.26             |
|                                                      | Scenario 5  | 5.17                   | 4.52                        | 5.06       | 4.31             |
|                                                      | Scenario 6  | 4.96                   | 4.30                        | 4.85       | 4.10             |
| Carbon utilization<br>efficiency                     | Scenario 7  | 5.56                   | 4.90                        | 5.45       | 4.69             |
|                                                      | Scenario 8  | 4.98                   | 4.33                        | 4.87       | 4.12             |
|                                                      | Scenario 9  | 4.55                   | 3.89                        | 4.44       | 3.69             |
|                                                      | Scenario 10 | 4.17                   | 3.51                        | 4.06       | 3.30             |
|                                                      | Scenario 11 | 3.66                   | 3.00                        | 3.55       | 2.79             |
|                                                      | Scenario 12 | 3.27                   | 2.62                        | 3.16       | 2.41             |
| Lignocellulosic glucose<br>feedstock                 | Scenario 13 | 7.84                   | 7.19                        | 7.73       | 6.98             |
|                                                      | Scenario 14 | 6.90                   | 6.24                        | 6.79       | 6.03             |
|                                                      | Scenario 15 | 5.51                   | 4.86                        | 5.40       | 4.65             |
|                                                      | Scenario 16 | 4.81                   | 4.15                        | 4.70       | 3.95             |
|                                                      | Scenario 17 | 4.28                   | 3.63                        | 4.17       | 3.42             |
|                                                      | Scenario 18 | 2.29                   | 1.63                        | 2.18       | 1.42             |
|                                                      | Scenario 19 | 1.34                   | 0.69                        | 1.23       | 0.48             |
|                                                      | Scenario 20 | 1.18                   | 0.52                        | 1.07       | 0.31             |
|                                                      | Scenario 21 | 1.09                   | 0.44                        | 0.98       | 0.23             |
|                                                      | Scenario 22 | 1.03                   | 0.37                        | 0.92       | 0.16             |
| Petrochemicals<br>(MJ surplus energy/kg polymer)     |             | Cradle-to-factory-gate | Cradle-to-grave life cycles |            |                  |
|                                                      |             |                        | EfW <sup>b</sup>            | Landfill   | Recycling        |
| PP                                                   |             | 9.34                   | 7.81                        | 9.53       | 0.52             |
| PET                                                  |             | 8.72                   | 7.77                        | 8.91       | 0.32             |
| LDPE                                                 |             | 9.25                   | 7.16                        | 9.44       | 0.52             |
| HDPE                                                 |             | 9.45                   | 7.36                        | 9.63       | 0.52             |

- a. AD=anaerobic digestion*
- b. Incineration with energy recovery (termed Energy-from-Waste (EfW))*
